# Supplementary figures and images for: Photo- and solvatochromic properties of nitrobenzospiropyran in ionic liquids containing the [NTf2]− anion
Source: Royal Society of Chemistry journal article supplement (doi:10.1039/b806641h), 2008-01-01

B806641H

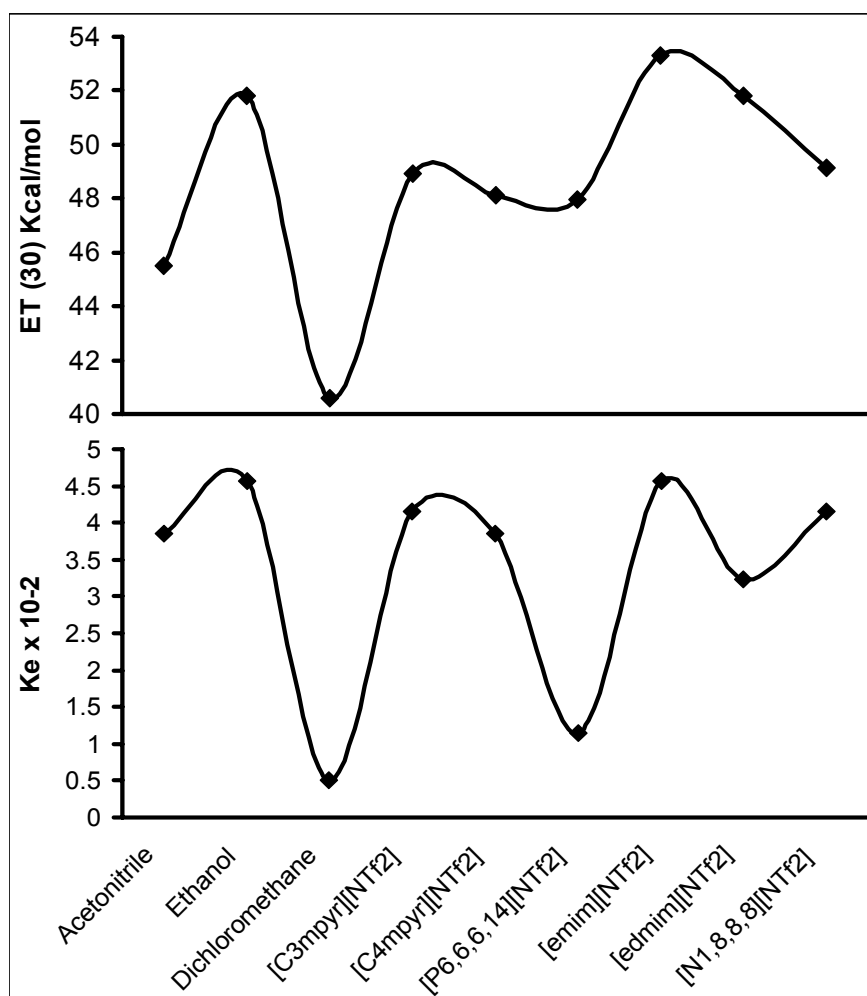

Figure S1. Correlation between  $K_e$  and  $E_T(30)$  values in molecular solvents and ionic liquids.

Supplement: b806641h.pdf [file b806641h.pdf]
